# Supplementary material for: Variation in complement protein C1q is not a major contributor to cognitive impairment in Parkinson’s disease
Source: PubMed Central journal article supplement — Neurosci Lett. 2015 May 6;594:66–9. doi: 10.1016/j.neulet.2015.03.048 (PMC4407898; doi:10.1016/j.neulet.2015.03.048), 2015-05-06
Supplement: mmc1.pdf [file mmc1.pdf]

312 **Supplementary Table 1** – Comparative analysis of *C1QA*, *C1QB* and *C1QC* genotypic and allelic frequency  
313 (Frequency and MAF) between PD cases and controls, showing; corresponding gene, variant (cDNA position),  
314 dbSNP id, predicted amino acid change (AA), genotypic and allele comparison (where P is Pearson’s chi-  
315 squared probability and *f* is Fisher’s exact probability).  
316

| Gene        | Variant     | dbSNP       | AA   | Genotype    | Genotypic   |                      |                      | Allele      | Allelic     |                       | P                     |
|-------------|-------------|-------------|------|-------------|-------------|----------------------|----------------------|-------------|-------------|-----------------------|-----------------------|
|             |             |             |      |             | Cases       | Controls             | P                    |             | Cases       | Controls              |                       |
| <i>C1QA</i> | c.215C>G    | rs149230484 | P4R  | CC          | 157 (0.994) | 100 (1.000)          | 4.3x10 <sup>-1</sup> | C           | 315 (0.997) | 200 (1.000)           | 1.0x10 <sup>-1f</sup> |
|             |             |             |      | CG          | 1 (0.006)   | 0 (0.000)            |                      | G           | 1 (0.003)   | 0 (0.000)             |                       |
|             |             |             |      | GG          | 0 (0.000)   | 0 (0.000)            |                      |             |             |                       |                       |
|             | c.271G>A    | rs17887074  | E23K | GG          | 157 (0.994) | 100 (1.000)          | 4.3x10 <sup>-1</sup> | G           | 315 (0.997) | 200 (1.000)           | 1.0x10 <sup>-1f</sup> |
|             |             |             |      | GA          | 1 (0.006)   | 0 (0.000)            |                      | A           | 1 (0.003)   | 0 (0.000)             |                       |
|             |             |             |      | AA          | 0 (0.000)   | 0 (0.000)            |                      |             |             |                       |                       |
|             | c.284G>A    | rs41507347  | R27Q | GG          | 158 (1.000) | 99 (0.990)           | 2.1x10 <sup>-1</sup> | G           | 316 (1.000) | 199 (0.995)           | 3.9x10 <sup>-1f</sup> |
|             |             |             |      | GA          | 0 (0.000)   | 1 (0.010)            |                      | A           | 0 (0.000)   | 1 (0.005)             |                       |
|             |             |             |      | AA          | 0 (0.000)   | 0 (0.000)            |                      |             |             |                       |                       |
|             | c.295A>C    | rs180679721 | I99L | AA          | 157 (0.994) | 100 (1.000)          | 4.3x10 <sup>-1</sup> | A           | 315 (0.997) | 200 (1.000)           | 1.0x10 <sup>-1f</sup> |
|             |             |             |      | AC          | 1 (0.006)   | 0 (0.000)            |                      | C           | 1 (0.003)   | 0 (0.000)             |                       |
|             |             |             |      | CC          | 0 (0.000)   | 0 (0.000)            |                      |             |             |                       |                       |
|             | c.329G>A    | rs20169349  | R42Q | GG          | 157 (0.994) | 100 (1.000)          | 4.3x10 <sup>-1</sup> | G           | 315 (0.997) | 200 (1.000)           | 1.0x10 <sup>-1f</sup> |
|             |             |             |      | GA          | 1 (0.006)   | 0 (0.000)            |                      | A           | 1 (0.003)   | 0 (0.000)             |                       |
|             |             |             |      | AA          | 0 (0.000)   | 0 (0.000)            |                      |             |             |                       |                       |
| c.480A>G    | rs172378    | R160R       | AA   | 57 (0.361)  | 44 (0.440)  | 3.8x10 <sup>-1</sup> | A                    | 192 (0.607) | 129 (0.775) | 4.0x10 <sup>-1</sup>  |                       |
|             |             |             | AG   | 78 (0.494)  | 41 (0.410)  |                      | G                    | 124 (0.393) | 71 (0.225)  |                       |                       |
|             |             |             | GG   | 23 (0.146)  | 15 (0.150)  |                      |                      |             |             |                       |                       |
| c.525C>T    | rs180679721 | I175I       | CC   | 155 (0.981) | 99 (0.990)  | 5.7x10 <sup>-1</sup> | C                    | 313 (0.991) | 199 (0.995) | 1.0x10 <sup>-1f</sup> |                       |
|             |             |             | CT   | 3 (0.019)   | 1 (0.010)   |                      | T                    | 3 (0.009)   | 1 (0.005)   |                       |                       |
|             |             |             | TT   | 0 (0.000)   | 0 (0.000)   |                      |                      |             |             |                       |                       |
| <i>C1QB</i> | -           | -           | -    | -           | -           | -                    | -                    | -           | -           | -                     |                       |
| <i>C1QC</i> | c.244C>T    | rs15940     | P42P | CC          | 97 (0.614)  | 61 (0.610)           | 8.6x10 <sup>-1</sup> | C           | 243 (0.768) | 155 (0.775)           | 9.1x10 <sup>-1</sup>  |
|             |             |             |      | CT          | 49 (0.310)  | 33 (0.330)           |                      | T           | 73 (0.232)  | 45 (0.225)            |                       |
|             |             |             |      | TT          | 12 (0.076)  | 6 (0.060)            |                      |             |             |                       |                       |
|             | C.232C>T    | rs140114929 | P78S | CC          | 158 (1.000) | 99 (0.990)           | 2.1x10 <sup>-1</sup> | C           | 316 (1.000) | 199 (0.995)           | 3.9x10 <sup>-1f</sup> |
|             |             |             |      | CT          | 0 (0.000)   | 1 (0.010)            |                      | T           | 0 (0.000)   | 1 (0.005)             |                       |
|             |             |             |      | TT          | 0 (0.000)   | 0 (0.000)            |                      |             |             |                       |                       |

317

318

319

320

321 **Supplementary Table 2** – Analysis of *MAPT* (H1/H2, rs9458), *COMT* (rs4680) and *APOE* (rs429358, rs7142)  
322 genotypes on mean baseline variables (where; SD is standard deviation, P is ANOVA probability, A is affected,  
323 U is unaffected and Comb. is combined, MMSE is mini-mental state exam score, UPDRS is the unified  
324 Parkinson’s disease rating scale, MoCA is the Montreal cognitive assessment score, PoA is power of attention,  
325 PRM is pattern recognition memory testing and SRM is spatial recognition memory testing.  
326

| Variable | MAPT  | Mean (SD)        |                   |                  | P                    |
|----------|-------|------------------|-------------------|------------------|----------------------|
|          |       | H1/H1            | H1/H2             | H2/H2            |                      |
| MMSE     | A     | 28.61 (1.3)      | 28.74 (1.2)       | 29.00 (1.0)      | 7.2x10 <sup>-1</sup> |
|          | U     | 29.20 (1.1)      | 28.87 (1.4)       | 28.71 (1.1)      | 3.5x10 <sup>-1</sup> |
|          | Comb. | 28.78 (1.3)      | 28.78 (1.3)       | 28.80 (1.3)      | 9.9x10 <sup>-1</sup> |
| UPDRS    | A     | 27.75 (11.5)     | 28.63 (12.9)      | 22.00 (2.64)     | 5.3x10 <sup>-1</sup> |
|          | U     | -                | -                 | -                | -                    |
|          | Comb. | -                | -                 | -                | -                    |
| MoCA     | A     | 25.15 (3.45)     | 25.29 (3.38)      | 27.67 (1.52)     | 4.5x10 <sup>-1</sup> |
|          | U     | 27.32 (2.66)     | 26.60 (2.29)      | 25.71 (2.13)     | 1.8x10 <sup>-1</sup> |
|          | Comb. | 25.83 (3.83)     | 25.75 (3.09)      | 26.30 (2.11)     | 8.8x10 <sup>-1</sup> |
| PoA      | A     | 1384.87 (211.17) | 1326.68 (162.23)  | 1215.57 (43.50)  | 6.8x10 <sup>-2</sup> |
|          | U     | 1262.16 (135.49) | 1298.45 (149.16)  | 1319.18 (100.28) | 3.9x10 <sup>-1</sup> |
|          | Comb. | 1349.72 (200.09) | 1317.58 (1577.85) | 1284.64 (97.17)  | 2.7x10 <sup>-1</sup> |
| PRM      | A     | 19.69 (3.20)     | 19.64 (3.16)      | 22.33 (2.88)     | 3.5x10 <sup>-1</sup> |
|          | U     | 20.91 (2.38)     | 20.17 (2.74)      | 20.14 (1.57)     | 3.8x10 <sup>-1</sup> |
|          | Comb. | 20.04 (3.03)     | 19.82 (3.02)      | 20.80 (2.15)     | 5.8x10 <sup>-1</sup> |
| SRM      | A     | 15.34 (2.17)     | 15.12 (2.23)      | 17.67 (0.57)     | 1.4x10 <sup>-1</sup> |
|          | U     | 16.22 (1.63)     | 15.72 (2.17)      | 16.71 (1.89)     | 3.3x10 <sup>-1</sup> |
|          | Comb. | 15.60 (2.06)     | 15.32 (2.22)      | 17.00 (1.63)     | 5.3x10 <sup>-2</sup> |

| Variable | COMT  | Mean (SD)     |              |               | P                    |
|----------|-------|---------------|--------------|---------------|----------------------|
|          |       | Met/Met       | Met/Val      | Val/Val       |                      |
| MMSE     | A     | 28.56 (1.5)   | 28.70 (1.22) | 28.65 (1.15)  | 8.2x10 <sup>-1</sup> |
|          | U     | 29.17 (1.1)   | 29.10 (1.2)  | 28.61 (1.3)   | 2.5x10 <sup>-1</sup> |
|          | Comb. | 28.80 (1.4)   | 28.82 (1.23) | 28.64 (1.18)  | 6.2x10 <sup>-1</sup> |
| UPDRS    | A     | 26.96 (10.09) | 27.67 (3.10) | 27.88 (13.20) | 9.1x10 <sup>-1</sup> |
|          | U     | -             | -            | -             | -                    |
|          | Comb. | -             | -            | -             | -                    |
| MoCA     | A     | 25.04 (3.60)  | 25.35 (3.24) | 25.28 (3.61)  | 8.8x10 <sup>-1</sup> |
|          | U     | 27.06 (2.66)  | 26.83 (2.52) | 27.17 (2.38)  | 8.7x10 <sup>-1</sup> |
|          | Comb. | 25.92 (3.36)  | 25.81 (3.10) | 25.81 (3.40)  | 9.7x10 <sup>-1</sup> |

|            |              |                  |                  |                  |                      |
|------------|--------------|------------------|------------------|------------------|----------------------|
| <i>PoA</i> | <i>A</i>     | 1389.44 (241.57) | 1351.56 (170.17) | 1368.26 (199.27) | $5.3 \times 10^{-1}$ |
|            | <i>U</i>     | 1289.63 (157.31) | 1268.07 (122.26) | 1272.99 (134.96) | $7.9 \times 10^{-1}$ |
|            | <i>Comb.</i> | 1351.31 (217.87) | 1327.44 (161.90) | 1343.41 (188.49) | $6.3 \times 10^{-1}$ |
| <i>PRM</i> | <i>A</i>     | 20.16 (2.82)     | 19.63 (2.90)     | 19.44 (3.98)     | $4.8 \times 10^{-1}$ |
|            | <i>U</i>     | 20.47 (2.54)     | 20.10 (2.53)     | 22.00 (1.45)     | $5.1 \times 10^{-2}$ |
|            | <i>Comb.</i> | 20.29 (2.70)     | 19.77 (2.76)     | 20.12 (3.66)     | $4.3 \times 10^{-1}$ |
| <i>SRM</i> | <i>A</i>     | 15.12 (1.84)     | 15.35 (2.34)     | 15.42 (2.25)     | $7.7 \times 10^{-1}$ |
|            | <i>U</i>     | 16.09 (1.73)     | 15.92 (2.00)     | 16.44 (1.68)     | $6.1 \times 10^{-1}$ |
|            | <i>Comb.</i> | 15.52 (1.85)     | 15.52 (2.25)     | 15.69 (2.15)     | $8.4 \times 10^{-1}$ |

| <i>Variable</i> | <i>APOE</i>  | <i>Mean (SD)</i> |                  |                  |                  |                  | <i>P</i>             |
|-----------------|--------------|------------------|------------------|------------------|------------------|------------------|----------------------|
|                 |              | <i>E2/E2</i>     | <i>E2/E3</i>     | <i>E3/E3</i>     | <i>E3/E4</i>     | <i>E4/E4</i>     |                      |
| <i>MMSE</i>     | <i>A</i>     | 28.00 (0.00)     | 23.31 (1.30)     | 28.66 (1.27)     | 28.70 (1.32)     | 28.75 (1.48)     | $7.8 \times 10^{-1}$ |
|                 | <i>U</i>     | 28.00 (1.41)     | 29.10 (0.87)     | 29.13 (1.21)     | 29.04 (1.19)     | 29.00 (0.00)     | $7.7 \times 10^{-1}$ |
|                 | <i>Comb.</i> | 28.00 (0.81)     | 28.62 (1.20)     | 28.81 (1.27)     | 28.80 (1.28)     | 28.78 (1.39)     | $7.2 \times 10^{-1}$ |
| <i>UPDRS</i>    | <i>A</i>     | 20.00 (5.65)     | 30.88 (11.06)    | 27.75 (15.51)    | 28.89 (10.25)    | 27.60 (11.53)    | $5.1 \times 10^{-1}$ |
|                 | <i>U</i>     | -                | -                | -                | -                | -                | -                    |
|                 | <i>Comb.</i> | -                | -                | -                | -                | -                | -                    |
| <i>MoCA</i>     | <i>A</i>     | 25.00 (4.24)     | 25.27 (3.91)     | 25.06 (3.59)     | 25.47 (3.32)     | 25.38 (1.47)     | $9.5 \times 10^{-1}$ |
|                 | <i>U</i>     | 25.50 (0.70)     | 26.80 (3.29)     | 27.05 (2.62)     | 27.25 (2.11)     | 26.00 (0.00)     | $8.8 \times 10^{-1}$ |
|                 | <i>Comb.</i> | 25.25 (2.50)     | 25.88 (3.67)     | 25.79 (3.40)     | 25.99 (3.11)     | 25.86 (1.34)     | $5.1 \times 10^{-1}$ |
| <i>PoA</i>      | <i>A</i>     | 1513.86 (190.67) | 1362.92 (124.26) | 1349.27 (182.22) | 1399.37 (242.73) | 1327.87 (149.80) | $4.3 \times 10^{-1}$ |
|                 | <i>U</i>     | 1223.23 (101.57) | 1235.60 (141.39) | 1265.49 (146.14) | 1311.48 (119.61) | 1333.61 (0.00)   | $5.4 \times 10^{-1}$ |
|                 | <i>Comb.</i> | 1368.54 (209.07) | 1317.08 (142.14) | 1322.19 (175.40) | 1374.26 (217.81) | 1328.51 (140.14) | $3.1 \times 10^{-1}$ |
| <i>PRM</i>      | <i>A</i>     | 24.00 (0.00)     | 19.87 (2.38)     | 19.69 (3.39)     | 19.51 (3.17)     | 20.88 (2.16)     | $5.5 \times 10^{-1}$ |
|                 | <i>U</i>     | 20.50 (2.12)     | 19.10 (3.10)     | 20.93 (2.20)     | 20.55 (2.68)     | 22.00 (0.00)     | $2.9 \times 10^{-1}$ |
|                 | <i>Comb.</i> | 21.67 (2.51)     | 19.56 (2.66)     | 20.11 (3.09)     | 19.80 (3.06)     | 21.00 (2.06)     | $5.7 \times 10^{-1}$ |
| <i>SRM</i>      | <i>A</i>     | 17.00 (0.00)     | 14.60 (1.45)     | 15.54 (2.04)     | 15.11 (2.63)     | 14.63 (0.91)     | $3.3 \times 10^{-1}$ |
|                 | <i>U</i>     | 13.00 (0.00)     | 16.40 (2.06)     | 16.28 (1.69)     | 15.95 (1.61)     | 19.00 (0.00)     | $4.3 \times 10^{-2}$ |
|                 | <i>Comb.</i> | 14.33 (2.30)     | 15.32 (1.90)     | 15.79 (1.96)     | 15.34 (2.41)     | 15.11 (1.69)     | $3.4 \times 10^{-1}$ |
